# Supplementary material
Source: PubMed Central journal article supplement (PMC4764146)
Supplement: supp_db15-0804_DB150804SupplementaryData.pdf [file supp_db15-0804_DB150804SupplementaryData.pdf]

SUPPLEMENTARY DATA

**Supplementary Figure 1.** Elevated glycosuria, which is reversed after epinephrine treatment, in weight-matched ArcPOMC-deficient mice during oral glucose tolerance (OGTT). (A) Semiquantitative urine glucose levels during OGTT, n=12; (B) Semi-quantitative urine glucose levels during OGTT in epinephrine treated mice, n=14.

**A**

| Number of weight-matched mice that manifested glycosuria during OGTT |        |        |        |        |        |        |         |        |    |        |
|----------------------------------------------------------------------|--------|--------|--------|--------|--------|--------|---------|--------|----|--------|
| Urine Glucose (mg/dl)                                                | 15 min |        | 30 min |        | 60 min |        | 120 min |        |    |        |
|                                                                      | WT     | Mutant | WT     | Mutant | WT     | Mutant | WT      | Mutant | WT | Mutant |
| 100                                                                  | 0      | 0      | 0      | 0      | 0      | 0      | 0       | 0      | 0  | 0      |
| 250                                                                  | 7      | 0      | 8      | 0      | 0      | 0      | 0       | 0      | 0  | 5      |
| 500                                                                  | 5      | 0      | 0      | 8      | 0      | 12     | 0       | 7      | 0  | 0      |
| 1000                                                                 | 0      | 5      | 0      | 4      | 0      | 0      | 0       | 0      | 0  | 0      |
| >2000                                                                | 0      | 7      | 0      | 0      | 0      | 0      | 0       | 0      | 0  | 0      |

**B**

| Number of mice that manifested glycosuria during OGTT in the presence of epinephrine |        |        |        |        |        |        |         |        |
|--------------------------------------------------------------------------------------|--------|--------|--------|--------|--------|--------|---------|--------|
| Urine Glucose (mg/dl)                                                                | 15 min |        | 30 min |        | 60 min |        | 120 min |        |
|                                                                                      | WT     | Mutant | WT     | Mutant | WT     | Mutant | WT      | Mutant |
| 100                                                                                  | 8      | 12     | 11     | 9      | 0      | 0      | 0       | 0      |
| 250                                                                                  | 6      | 2      | 3      | 5      | 0      | 0      | 0       | 0      |
| 500                                                                                  | 0      | 0      | 0      | 0      | 0      | 0      | 0       | 0      |
| 1000                                                                                 | 0      | 0      | 0      | 0      | 0      | 0      | 0       | 0      |
| >2000                                                                                | 0      | 0      | 0      | 0      | 0      | 0      | 0       | 0      |

SUPPLEMENTARY DATA

**Supplementary Figure 2.** MT II reverses glycosuria in ArcPOMC-deficient mice and Agrp induces glycosuria in WT mice. (A) Semi-quantitative urine glucose levels during OGTT after MT II or saline treatment in ArcPOMC-deficient mice, n=12; (B) Semi-quantitative urine glucose levels during OGTT after Agrp or saline treatment in WT mice, n=12.

**A**

| Number of ArcPOMC KO mice that manifested glycosuria during OGTT |         |       |         |       |          |       |        |       |
|------------------------------------------------------------------|---------|-------|---------|-------|----------|-------|--------|-------|
| Urine Glucose (mg/dl)                                            | 15 min. |       | 60 min. |       | 120 min. |       |        |       |
|                                                                  | Saline  | MT II | Saline  | MT II | Saline   | MT II | Saline | MT II |
| 100                                                              | 0       | 0     | 0       | 6     | 0        | 0     | 0      | 0     |
| 250                                                              | 0       | 6     | 0       | 0     | 2        | 0     | 0      | 0     |
| 500                                                              | 4       | 0     | 1       | 0     | 3        | 0     | 0      | 0     |
| 1000                                                             | 2       | 0     | 5       | 0     | 0        | 0     | 0      | 0     |
| >2000                                                            | 0       | 0     | 0       | 0     | 0        | 0     | 0      | 0     |

**B**

| Number of WT mice that manifested glycosuria during OGTT |         |      |         |      |          |      |        |      |
|----------------------------------------------------------|---------|------|---------|------|----------|------|--------|------|
| Urine Glucose (mg/dl)                                    | 15 min. |      | 60 min. |      | 120 min. |      |        |      |
|                                                          | Saline  | Agrp | Saline  | Agrp | Saline   | Agrp | Saline | Agrp |
| 100                                                      | 3       | 0    | 4       | 0    | 0        | 0    | 0      | 0    |
| 250                                                      | 3       | 6    | 2       | 5    | 0        | 0    | 0      | 0    |
| 500                                                      | 0       | 0    | 0       | 1    | 0        | 0    | 0      | 0    |
| 1000                                                     | 0       | 0    | 0       | 0    | 0        | 0    | 0      | 0    |
| >2000                                                    | 0       | 0    | 0       | 0    | 0        | 0    | 0      | 0    |
